# Supplementary material for: The glutamine transporter ASCT2 (SLC1A5) promotes tumor growth independently of the amino acid transporter LAT1 (SLC7A5)
Source: PubMed Central journal article supplement (PMC5827425; doi:10.1074/jbc.ra117.001342), 2018-01-11
Supplement: supp_RA117.001342_134499_1_supp_45063_p1m4dl.pdf [file supp_RA117.001342_134499_1_supp_45063_p1m4dl.pdf]

## **Supplementary Tables & Figure legends**

### **Table S1**

Summary of the mutations introduced by CRISPR/Cas9 in each LS174T- and A549-*ASCT2*<sup>KO</sup> clones used. *LAT1*<sup>KO</sup> clones were characterized in a previous study (24)

### **Table S2**

Amino acid concentrations for each of the culture media used in this study are described. These concentrations are compared with physiological concentration summarized in (48)

### **Figure S1**

A: Time-dependent activation points of mTORC1 were compared between LS174T-WT -*ASCT2*<sup>KO#1</sup> and *LAT1*<sup>KO</sup> cells. Cells were first serum- and AA-starved for 2 hours followed by 20 min of pre-incubation with 500  $\mu$ M of glutamine. LS174T-derived cells were then incubated with 200  $\mu$ M of leucine for 0, 5, 10 and 20 minutes and mTORC1 activity was measured through the phosphorylation level of S6.

B: Cells were starved of glutamine only in DMEM for 24h and then glutamine was re-introduced to observe the impact on mTORC1 activity over 10, 30, and 120 minutes as described for the LS174 cell types in part A. WB data presented are representative of 3 independent experiments.

### **Figure S2**

Induction of the AA-stress response pathway and reduction of mTORC1 activity in LS174T cells (*WT/ASCT2*<sup>KO</sup>/*LAT1*<sup>KO</sup>) occurs in the absence of external glutamine. Cells were subjected to glutamine removal only in DMEM and the AA-stress response pathway (p-GCN2/eIF2/ATF4) and mTORC1 activity (p-S6K1/p-S6) were monitored for 6, 24 and 30 hours. HSP90 served as a loading control. Data presented are representative of 3 independent experiments.

### **Figure S3**

The glutamine synthetase inhibitor methionine sulfoximine (MSO) decreases S6K1 phosphorylation in LS174 WT- *ASCT2*<sup>KO</sup> and *LAT1*<sup>KO</sup> cells. MSO (3mM) was applied to cells grown in DMEM containing 500 $\mu$ M and mTORC1 activity was observed for 1, 3 and 6h by monitoring S6K1/S6 phosphorylation with ARD1 acting as an additional loading control. Data presented are representative of 3 independent experiments.

### **Figure S4**

A: Clonal growth of LS174T-WT and *ASCT2*<sup>KO</sup> cell lines. Cells were cultivated for 15 days with DMSO or different concentration of the LAT1 specific inhibitor (10, 20, 30 $\mu$ M) in 0.3X media. The media was replaced every 2 days to maintain constant AA concentrations and colored for visualization using Giemsa.

B: Dose response analysis of the LAT1 specific inhibitor JPH203 in A549-WT (black) and A549-*ASCT2*<sup>KO</sup> (grey) cells. Cells were cultivated for 3 days in 0.3X DMEM containing different concentrations of inhibitor and cell numbers were counted to determine proliferation rates. Data presented in this figure are combined from a minimum of 3 independent experiments.

### **Figure S5**

Clonal growth of WT and *ASCT2*<sup>KO</sup> cell lines. Cells were cultivated for 15 days with different concentration of the SNATs inhibitor MeAIB (1, 5, 10 mM) in 0.3X media. The media was replaced every 2 days to maintain constant AA concentrations and colored for visualization using Giemsa.
