# Supplementary material for: The glutamine transporter ASCT2 (SLC1A5) promotes tumor growth independently of the amino acid transporter LAT1 (SLC7A5)
Source: PubMed Central journal article supplement (PMC5827425; doi:10.1074/jbc.ra117.001342), 2018-01-11
Supplement: supp_RA117.001342_134499_1_supp_51641_p2wtv2.pdf [file supp_RA117.001342_134499_1_supp_51641_p2wtv2.pdf]

|                      | <b>Plasma*</b> | <b>DMEM#</b> | <b>0.3X</b> | <b>0.1X</b> |
|----------------------|----------------|--------------|-------------|-------------|
| <b>Alanine</b>       | 146 - 494      | 100          | 100         | 33,3        |
| <b>Arginine</b>      | 28-132         | 400          | 133,3       | 40          |
| <b>Asparagine</b>    | 32-92          | 100          | 100         | 33,3        |
| <b>Aspartate</b>     | 2-22.5         | 100          | 100         | 33,3        |
| <b>Cystine</b>       | 24--58.3       | 200          | 66,7        | 20          |
| <b>Glutamate</b>     | 6-62           | 100          | 100         | 33,3        |
| <b>Glutamine</b>     | 450-798        | 4000         | 500         | 166,7       |
| <b>Glycine</b>       | 147-299        | 400          | 133,3       | 40          |
| <b>Histidine</b>     | 72-108         | 200          | 66,7        | 20          |
| <b>Isoleucine</b>    | 46-122         | 800          | 266,7       | 80          |
| <b>Leucine</b>       | 79-205         | 800          | 266,7       | 80          |
| <b>Lysine</b>        | 135-243        | 800          | 266,7       | 80          |
| <b>Methionine</b>    | 13-37          | 200          | 66,7        | 20          |
| <b>Phenylalanine</b> | 46-84,8        | 400          | 133,3       | 40          |
| <b>Proline</b>       | 97-297         | 100          | 100         | 33,3        |
| <b>Serine</b>        | 85-165         | 400 (+100)   | 133,3(+100) | 40(+33,3)   |
| <b>Threonine</b>     | 92-180         | 800          | 266,7       | 80          |
| <b>Tryptophan</b>    | 21-65          | 80           | 26,7        | 8           |
| <b>Tyrosine</b>      | 37-82,8        | 400          | 133,3       | 40          |
| <b>Valine</b>        | 179-335        | 800          | 266,7       | 80          |

\* : From J.R. Mayers and M.G. Vander Heiden, Trends Biochem Sci. 2015

# : DMEM supplemented with MEM NEAA  
Concentration in  $\mu\text{M}$

Table S1

| <b>Clone</b>                        | <b>Allele</b> | <b>Mutation type</b> | <b>Mutation Sequence</b> |
|-------------------------------------|---------------|----------------------|--------------------------|
| <b>LS174T-ASCT2<sup>KO</sup> #1</b> | 1             | Deletion             | GG                       |
|                                     | 2             | Deletion             | GTGGGGCA                 |
| <b>LS174T-ASCT2<sup>KO</sup> #2</b> | 1             | Deletion             | G                        |
|                                     | 2             | Deletion             | GG                       |
| <b>A549-ASCT2<sup>KO</sup> #1</b>   | 1             | Deletion             | G                        |
|                                     | 2             | Deletion             | TGTG                     |
| <b>A549-ASCT2<sup>KO</sup> #2</b>   | 1 & 2         | Deletion             | GG                       |

Targeted sequence : ASCT2 exon 5 : GTGGGGCATCGTGACGCCGC

**A**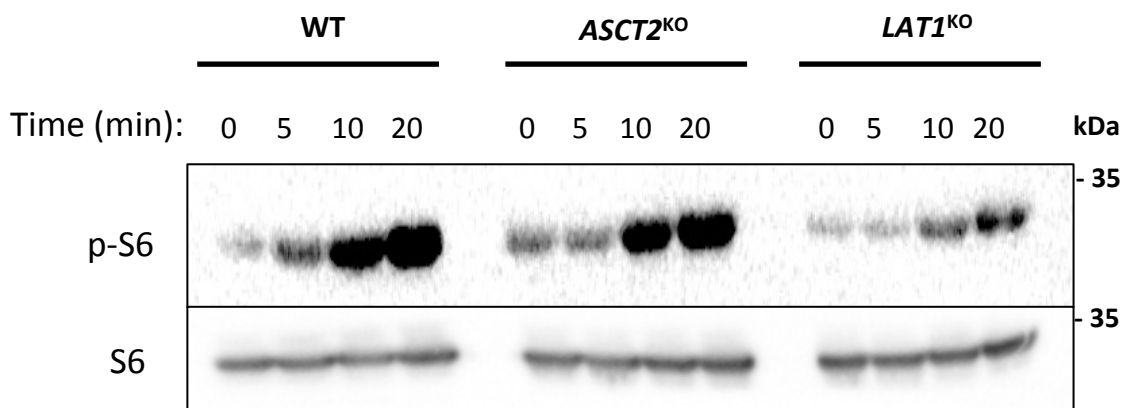**B**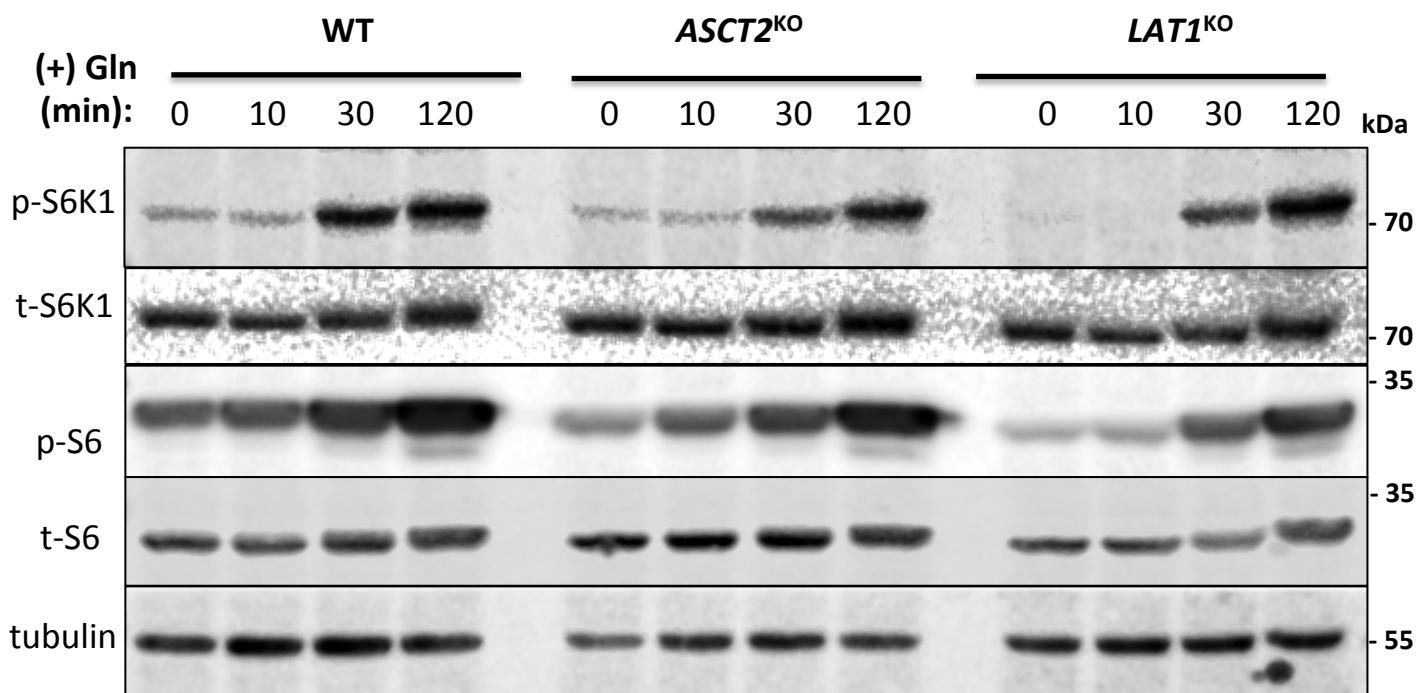

Figure S1

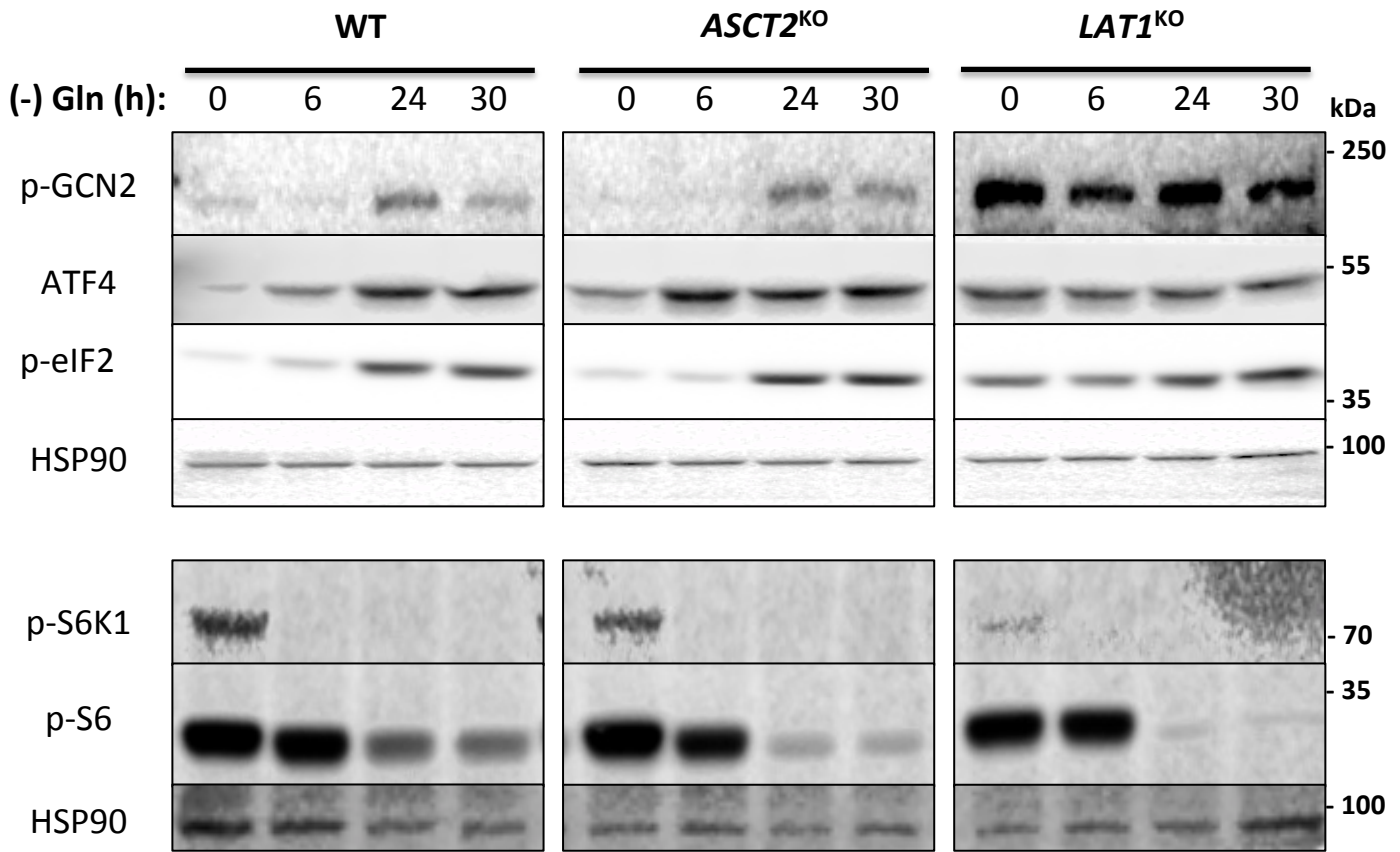

Figure S2

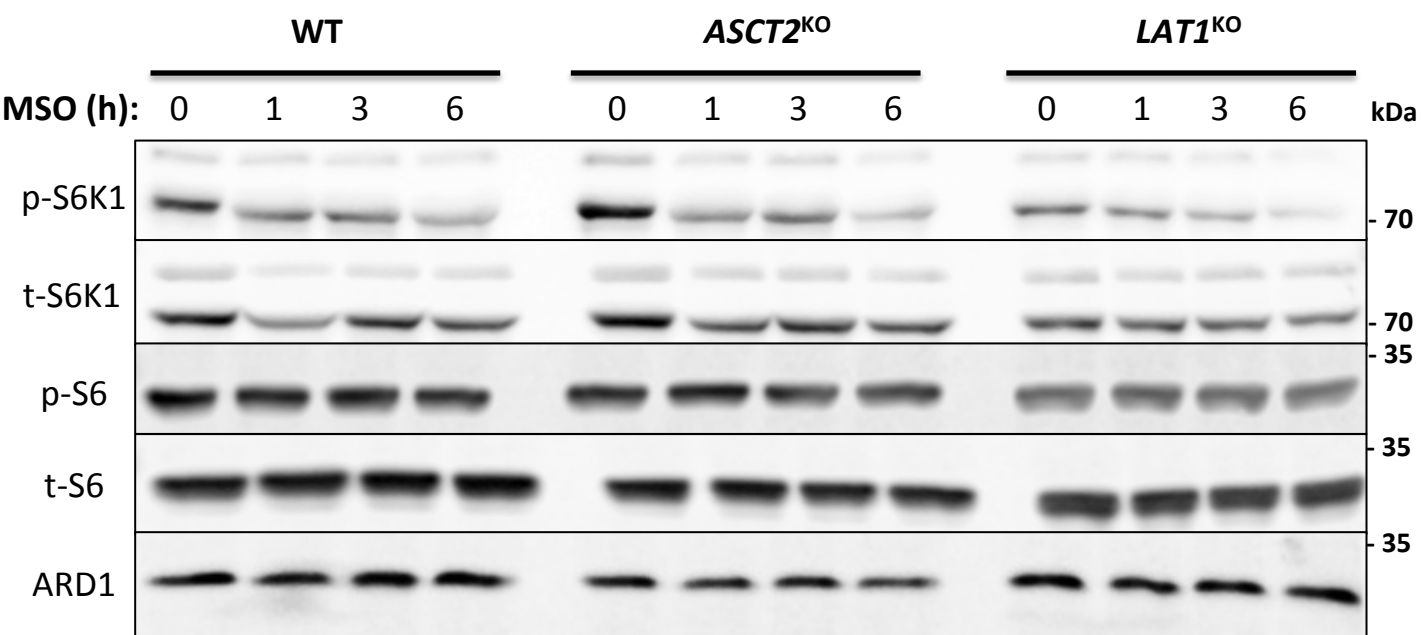

Figure S3

**A**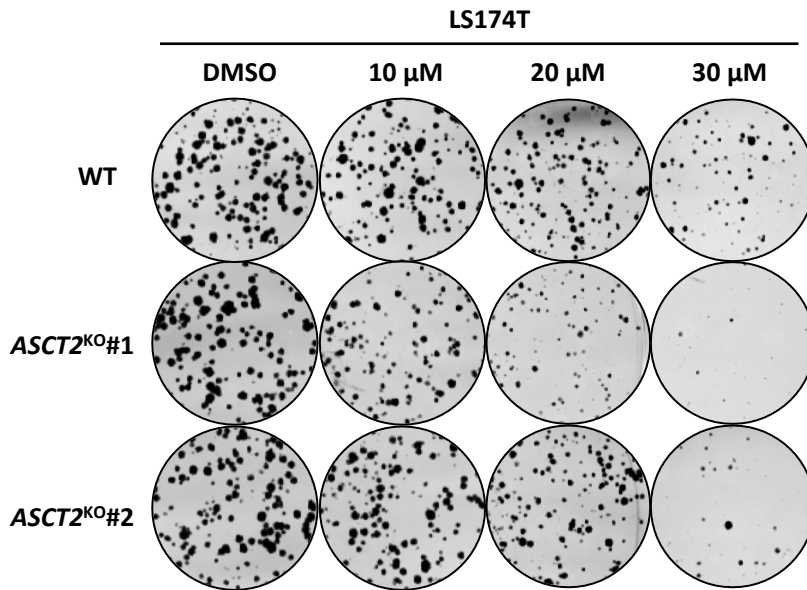**B**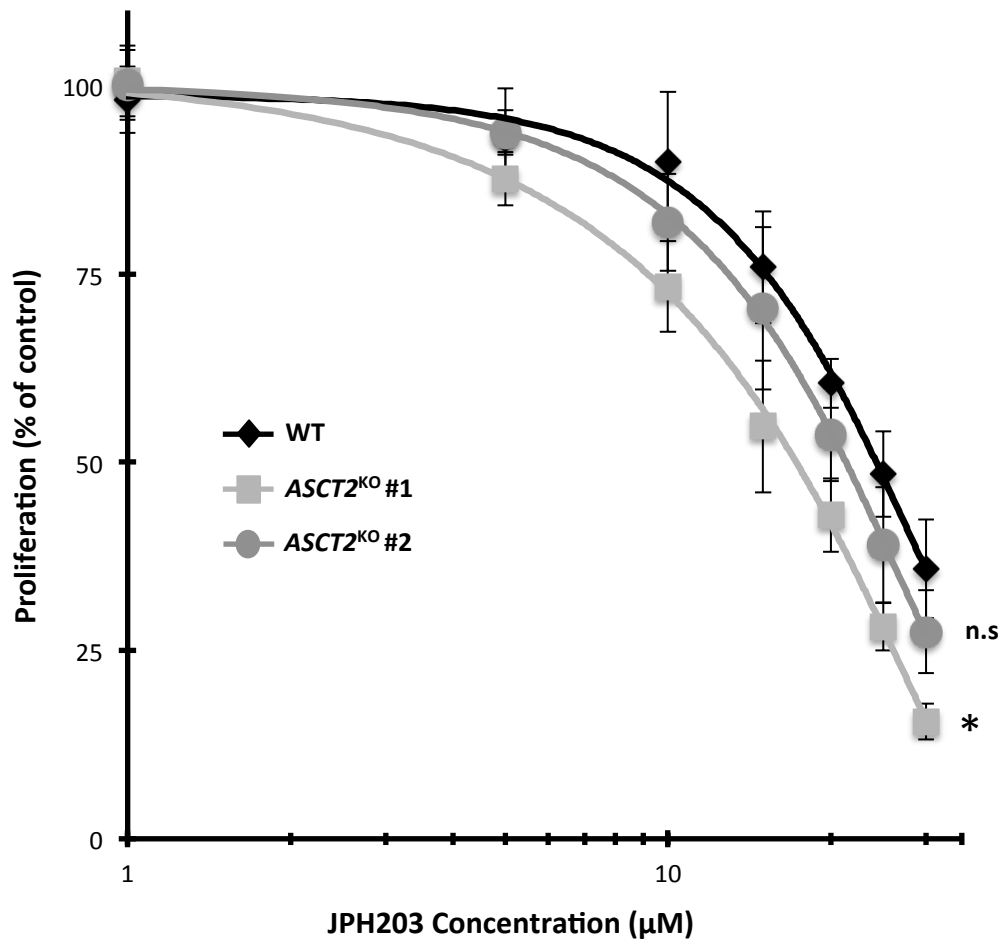

Figure S4

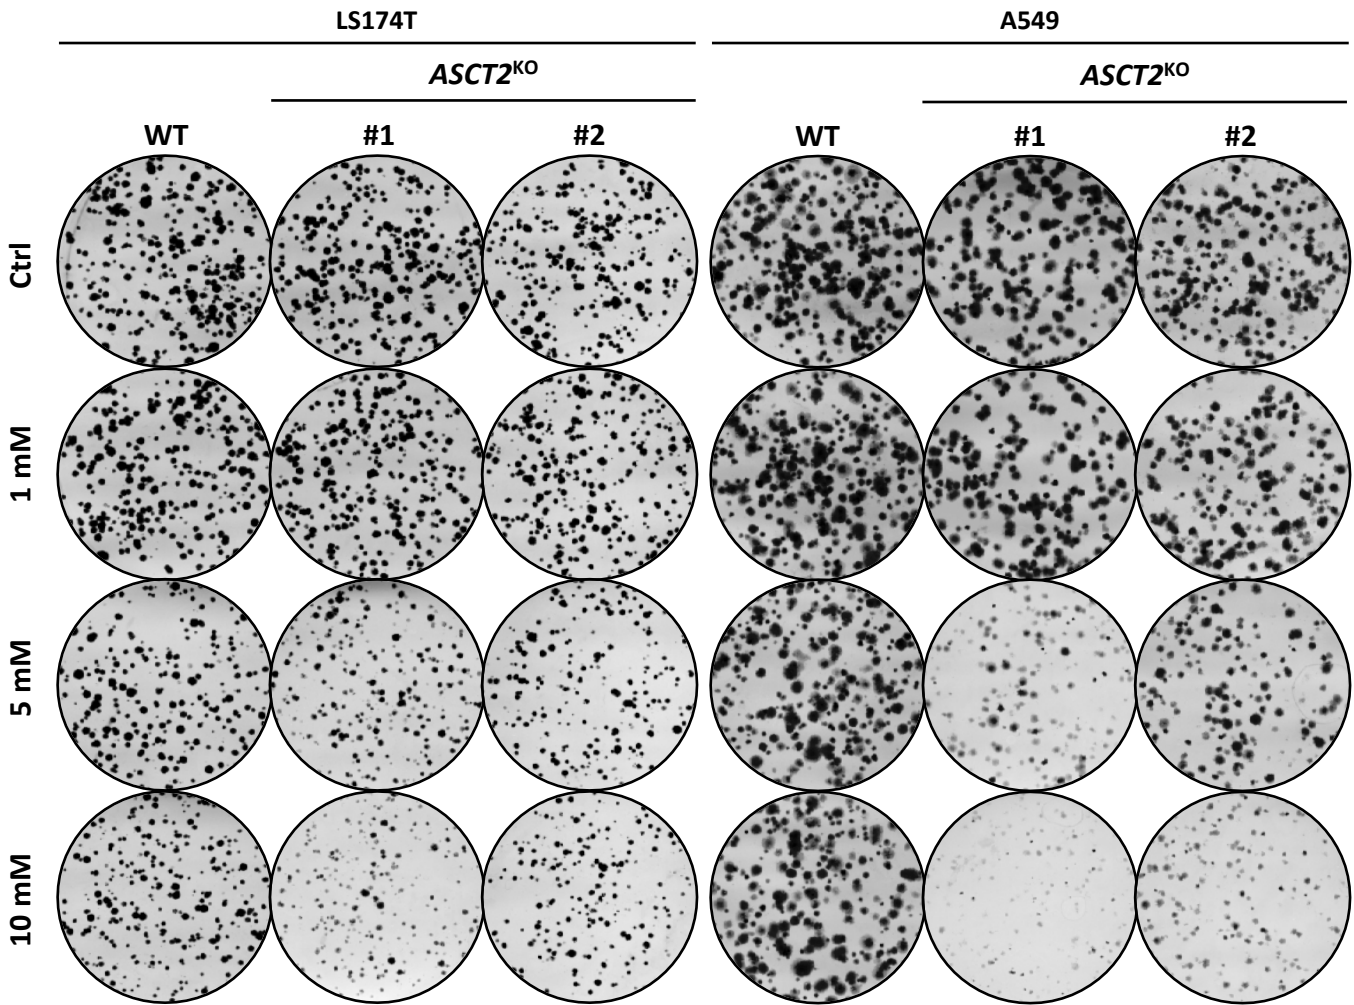

Figure S5
